# Supplementary material for: Induction of Neuroinflammation and Brain Oxidative Stress by Brain-Derived Extracellular Vesicles from Hypertensive Rats
Source: MDPI journal article supplement (doi:10.3390/antiox13030328), 2024-03-07
Supplement: s1 [file s1]

## Supplementary materials

**Table S1.** Primers, gene accession numbers, antibodies, and reagents

| Primers                                                                      | Assay ID      | Accession No.         |
|------------------------------------------------------------------------------|---------------|-----------------------|
| Tumor Necrosis Factor alpha (TNF $\alpha$ )                                  | Rn99999017_m1 | NM_012675.3           |
| Interleukin-1 beta (IL-1 $\beta$ )                                           | Rn00580432_m1 | NM_031512.2           |
| Interleukin 6 (IL-6)                                                         | Rn01410330_m1 | NM_012589.2           |
| C-C Motif Chemokine Ligand 2 (CCL2)                                          | Rn00580555_m1 | NM_031530.1           |
| C-C Motif Chemokine Ligand 5 (CCL5)                                          | Rn00579590_m1 | NM_031116.3           |
| C-C Motif Chemokine Ligand 2 (CCL12)                                         | Rn01464638_m1 | NM_001105822.1        |
| Nitric Oxide Synthase, Inducible (iNOS)                                      | Rn00561646_m1 | NM_012611.3           |
| Nuclear factor of kappa light polypeptide gene enhancer in B-cells 1 (NF-kB) | Rn01399583_m1 | NM_001276711.1        |
| FBJ osteosarcoma oncogene (c-Fos)                                            | Rn02396759_m1 | NM_022197.2           |
| Fos-like antigen 1 (FOSL1)                                                   | Rn00564119_m1 | NM_012953.1           |
| Cytochrome b-245, alpha polypeptide (CYBA)                                   | Rn00577357_m1 | NM_024160.1           |
| Cytochrome b-245, beta polypeptide (CYBB)                                    | Rn00576710_m1 | NM_023965.1           |
| Glyceraldehyde-3-phosphate dehydrogenase (GAPDH)                             | Rn01775763_g1 | NM_017008.4           |
| Primary Antibodies                                                           | Accession No. | Working concentration |
| Anti-GM130 (Golgi matrix protein 130 kD, GM130)                              | sc-55591      | 1:200                 |
| Anti-Alix (ALG-2 interacting protein X, Alix)                                | sc-53540      | 1:200                 |
| Anti-TSG101 (tumor susceptibility 101, TSG101)                               | sc-7964       | 1:200                 |
| Anti-CD9 (CD9 molecule, CD9)                                                 | 98327         | 1:1000                |
| Anti-NeuN (Neuronal nuclei, NeuN)                                            | 24307         | 1:300                 |
| Anti-GFAP (Glial fibrillary acidic protein, GFAP)                            | 3670          | 1:300                 |
| Anti-Iba1 (Ionized calcium binding adaptor molecule 1, Iba1)                 | 019-19741     | 1:500                 |
| Reagents                                                                     | Accession No. | Source                |
| Collagenase D                                                                | 11088866001   | Sigma-Aldrich         |
| DNase I                                                                      | 11284932001   | Sigma-Aldrich         |
| Protease and Phosphatase Inhibitor Cocktail                                  | PPC1010       | Sigma-Aldrich         |

|                                                          |           |                         |
|----------------------------------------------------------|-----------|-------------------------|
| Hibernate™-E Medium                                      | A1247601  | ThermoFisher Scientific |
| RNeasy Mini Kit (250)                                    | 74106     | QIAGEN                  |
| iScript™ cDNA Synthesis Kit                              | 1708891   | Bio-Rad Laboratories    |
| TaqMan™ Fast Advanced Master Mix for qPCR                | 4444964   | ThermoFisher Scientific |
| RIPA Buffer (10X)                                        | 9806      | Cell Signaling          |
| Phenylmethanesulfonyl Fluoride (PMSF)                    | 8553      | Cell Signaling          |
| Protein Standard II                                      | 5000007   | BIO-RAD                 |
| Bradford Reagent                                         | B6916     | Sigma-Aldrich           |
| 10x Tris/Glycine/SDS Buffer                              | 1610772   | BIO-RAD                 |
| 10x Tris Buffered Saline (TBS)                           | 1706435   | BIO-RAD                 |
| SuperSignal™ West Dura Extended Duration Substrate       | 34075     | ThermoFisher Scientific |
| VECTASHIELD® HardSet™ Antifade Mounting Medium with DAPI | H-1500-10 | Vector Labs             |
| Hoechst                                                  | 62249     | ThermoFisher Scientific |
| Donkey anti-rabbit IgG, Alexa Fluor™ 488                 | A32790    | ThermoFisher Scientific |
| Donkey anti-mouse IgG, Alexa Fluor™ 488                  | A-21202   | ThermoFisher Scientific |
| Rabbit IgG HRP Linked Whole Ab                           | NA934     | Sigma-Aldrich           |
| Mouse IgG HRP Linked Whole Ab                            | NA931     | Sigma-Aldrich           |

---
